# Supplementary material for: LncRNA MIR31HG Drives Oncogenicity by Inhibiting the Limb-Bud and Heart Development Gene (LBH) during Oral Carcinoma
Source: MDPI journal article supplement (doi:10.3390/ijms22168383), 2021-08-04
Supplement: s1 [file s1]

## Supplementary materials

### Supplementary figures

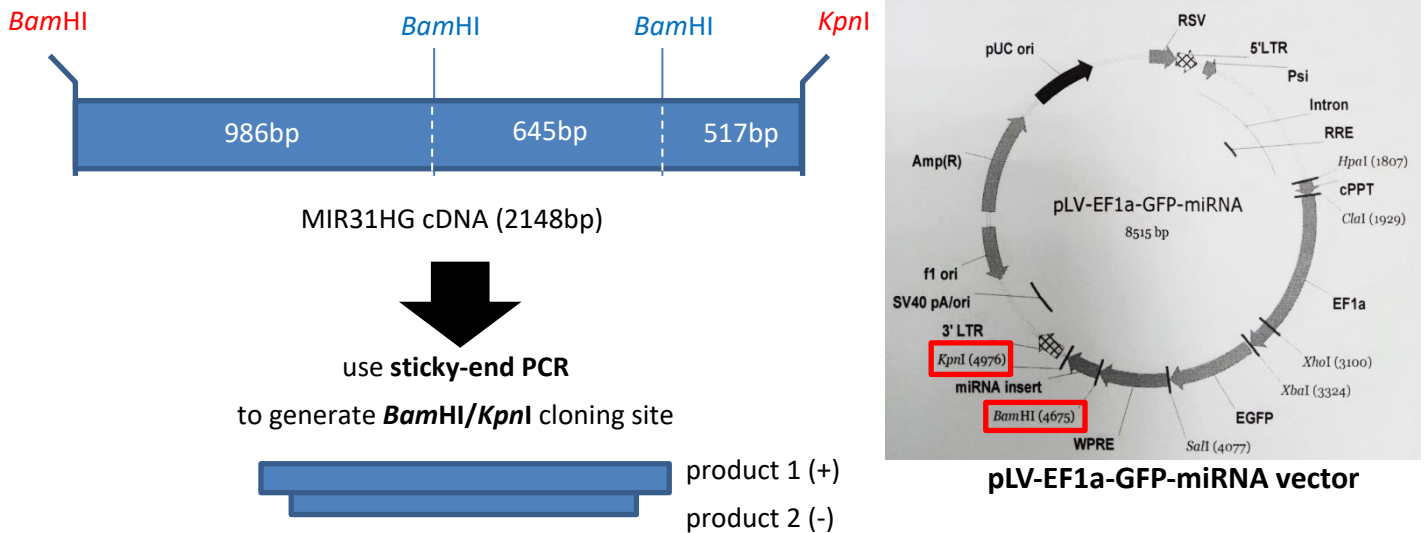

#### F1+R1 PCR product 1

**GATCC**AGGTTCCACGTCCGGCGCCTGGAG.....ACAATAATCCTTTGTGACCTT  
TGT**GGTAC**  
CTAGGTCCAAGGTGCAGGCCGCGGACCTC.....T**GTTATTTAGGAA**CACTGGAA  
**ACAGCCATG**

#### F2+R2 PCR product 2

**C**AGGTTCCACGTCCGGCGCCTGGAG.....ACAATAATCCTTTGTGACCTTT  
GT**CG**  
**G**TCCAAGGTGCAGGCCGCGGACCTC.....T**GTTATTTAGGAA**CACTGGAA  
**ACAGC**

mix and  
re-anneal

#### one of re-annealing products with **BamHI/KpnI** sticky-end

**GATCC**AGGTTCCACGTCCGGCGCCTGGAG.....ACAATAATCCTTTGTGACCTT  
TGT**GGTAC**  
**G**TCCAAGGTGCAGGCCGCGGACCTC.....T**GTTATTTAGGAA**CACTGGAA  
**ACAGC**

#### one of re-annealing products

**C**AGGTTCCACGTCCGGCGCCTGGAG.....ACAATAATCCTTTGTGACCTT  
TGT**CG**  
CTAGGTCCAAGGTGCAGGCCGCGGACCTC.....T**GTTATTTAGGAA**CACTGGAA  
**ACAGCCATG**

**Figure S1. *MIR31HG* lentiviral plasmid.** The strategy for the construction of the

*MIR31HG* lentiviral plasmid that was used to establish stable overexpression in cells.

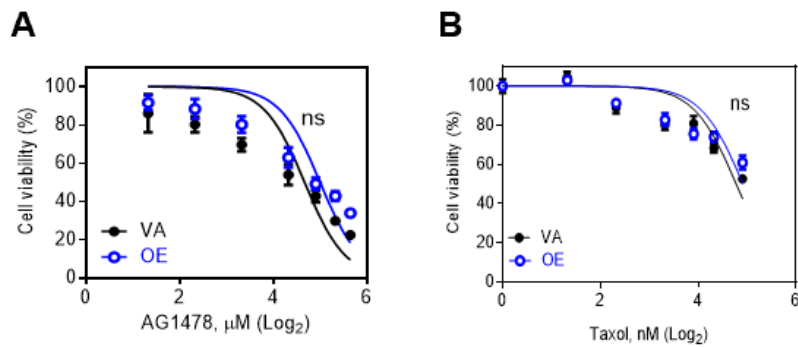

**Figure S2.** The dose-responses of OE and VA cells. (A) AG1478; (B) taxol.

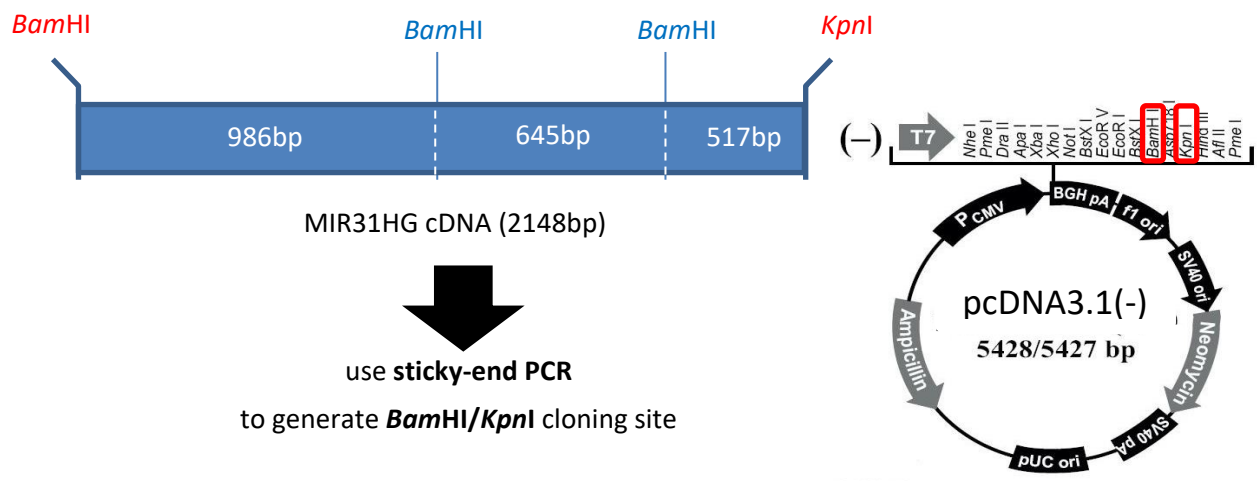

**Figure S3.** *MIR31HG* transient overexpression plasmid. The strategy for the construction of the *MIR31HG* plasmid for transient overexpression.

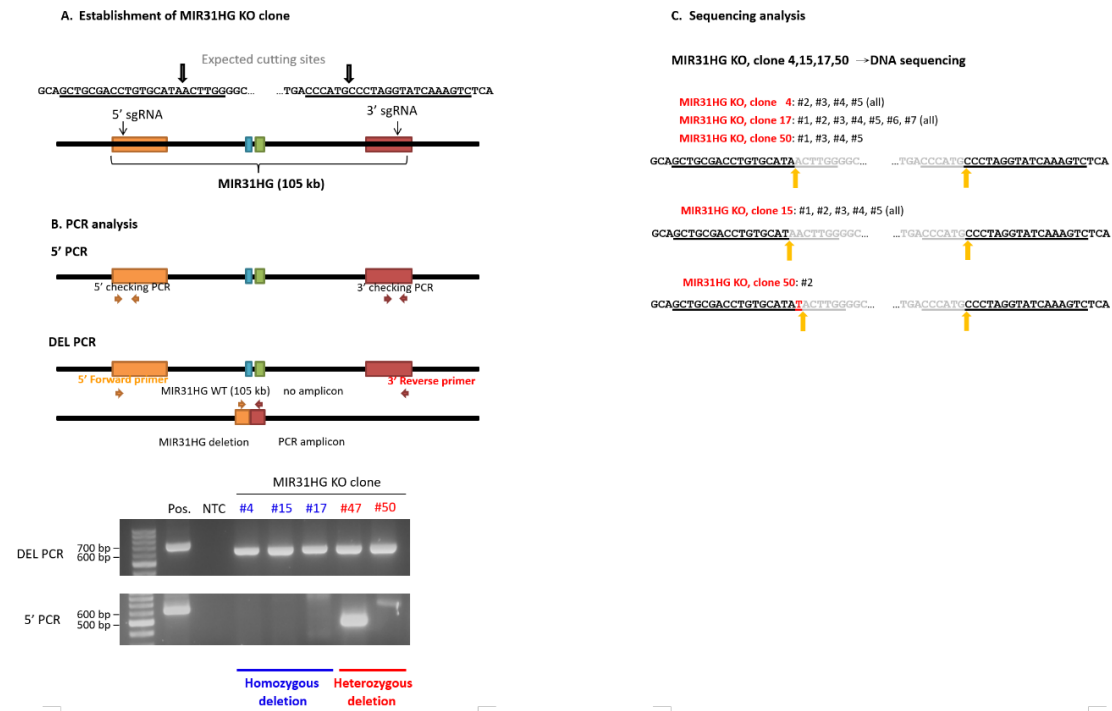

**Figure S4. Construction of the *MIR31HG* Crispr/Cas9 plasmids and the establishment of stable cell subclones containing *MIR31HG* deletion.** (A) The design of *MIR31HG* knockout. (B) PCR analysis. (C) Sequencing of the knockout cell subclones.

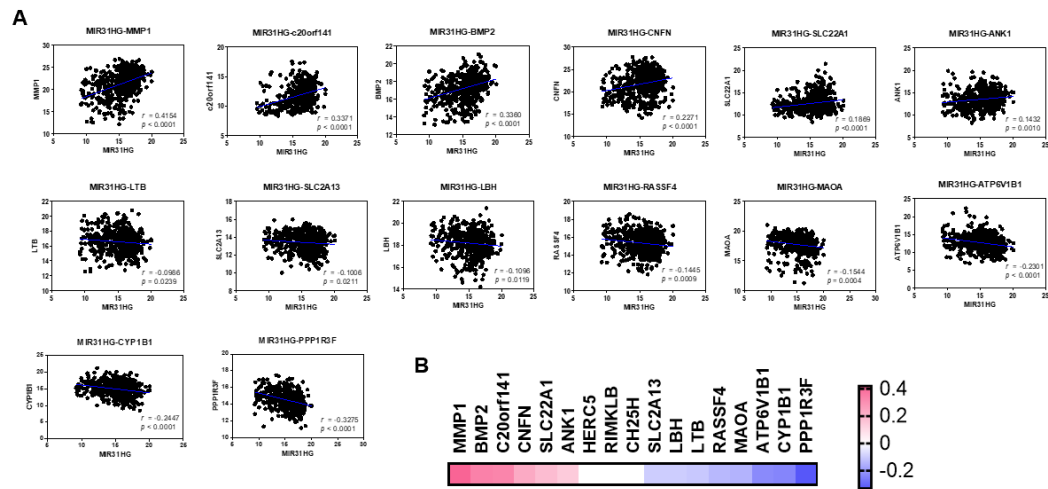

**Figure S5. The association between *MIR31HG* expression and the expression of seventeen candidate genes in HNSCC tumors based on the TCGA dataset. (A) Individual analysis. (B) Heatmap to illustrate the correlations. The expression levels of a number of genes, but not of *CH25H*, *RIMKLB* and *HERC5*, are correlated with *MIR31HG* expression. Gradient bar, correlation coefficient.**

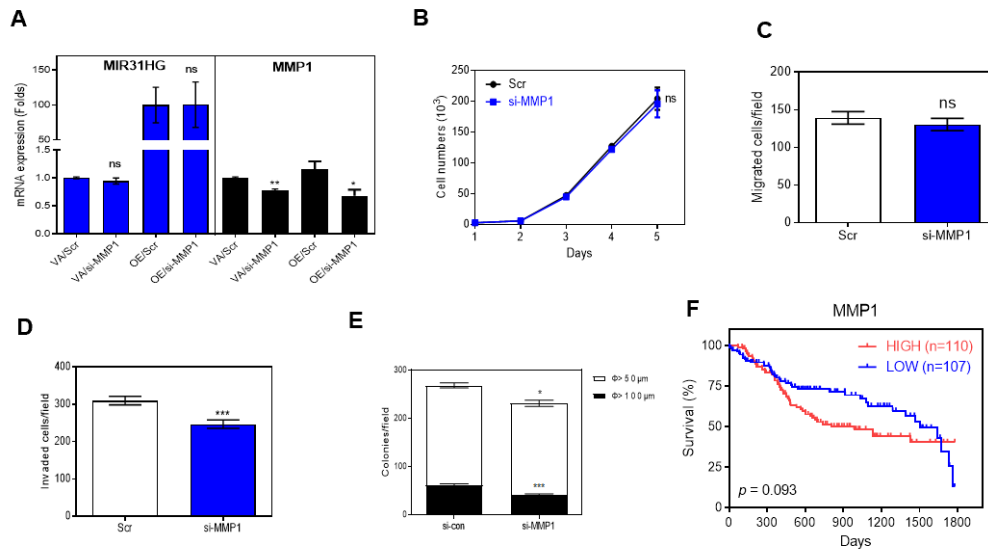

**Figure S6. Knockdown of *MMP1* expression decreases invasion and colony formation by SAS cells.** (A) qRT-PCR analysis. This indicates that there are slightly increases and decreases in *MMP1* mRNA expression following deletion of *MIR31HG* and knockdown of *MMP1*, respectively. (B – E) proliferation, migration, invasion and anchorage-independent colony formation assays. The knockdown of *MMP1* is associated with decreases in invasion and colony formation. (F) Survival analysis of HNSCC as related to *MMP1* expression in the TCGA tumor cohort. The tumors with *MMP1* expression in the highest quadrant exhibit a worse prognosis than their counterpart tumors in the lowest *MMP1* expression quadrant.

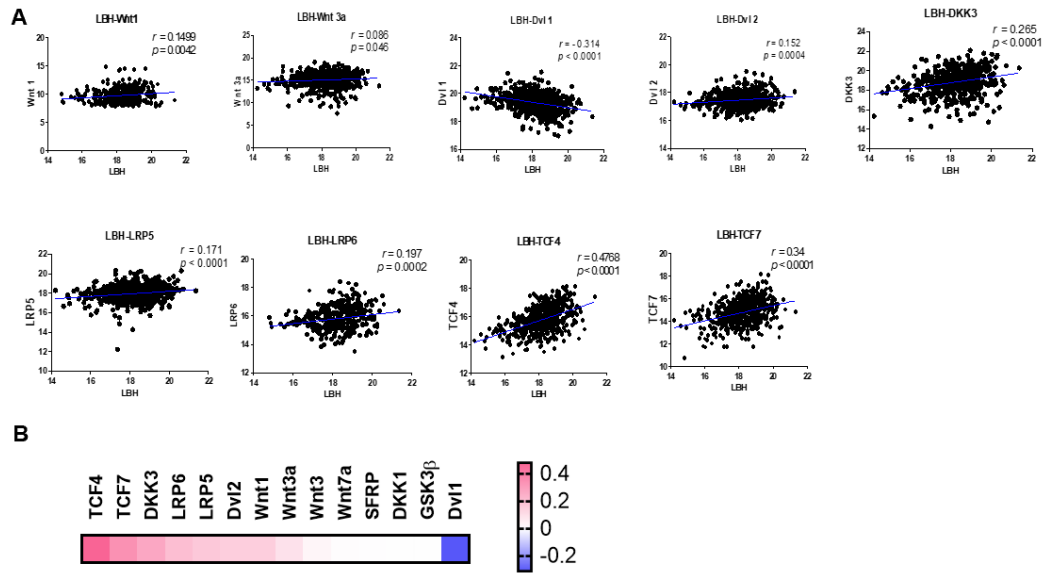

**Figure S7. The correlation between *LBH* expression and the expression of genes involved in the Wnt signaling cascade in HNSCC tumors from the TCGA dataset.** (A) Individual analysis of the expression of genes that are correlated with *LBH* expression. (B) Heatmap to illustrate the correlation. A correlation with *LBH* expression, mostly a positive correlation, was found for nine of the fourteen genes analyzed. *TCF4* and *TCF7* expression can be seen to be highly correlated with *LBH* expression. The expression of *Wnt3*, *Wnt7a*, *SFRP1*, *DKK1* and *GSK3 $\beta$*  is not significantly correlated with *LBH* expression. Gradient bar, correlation coefficient.

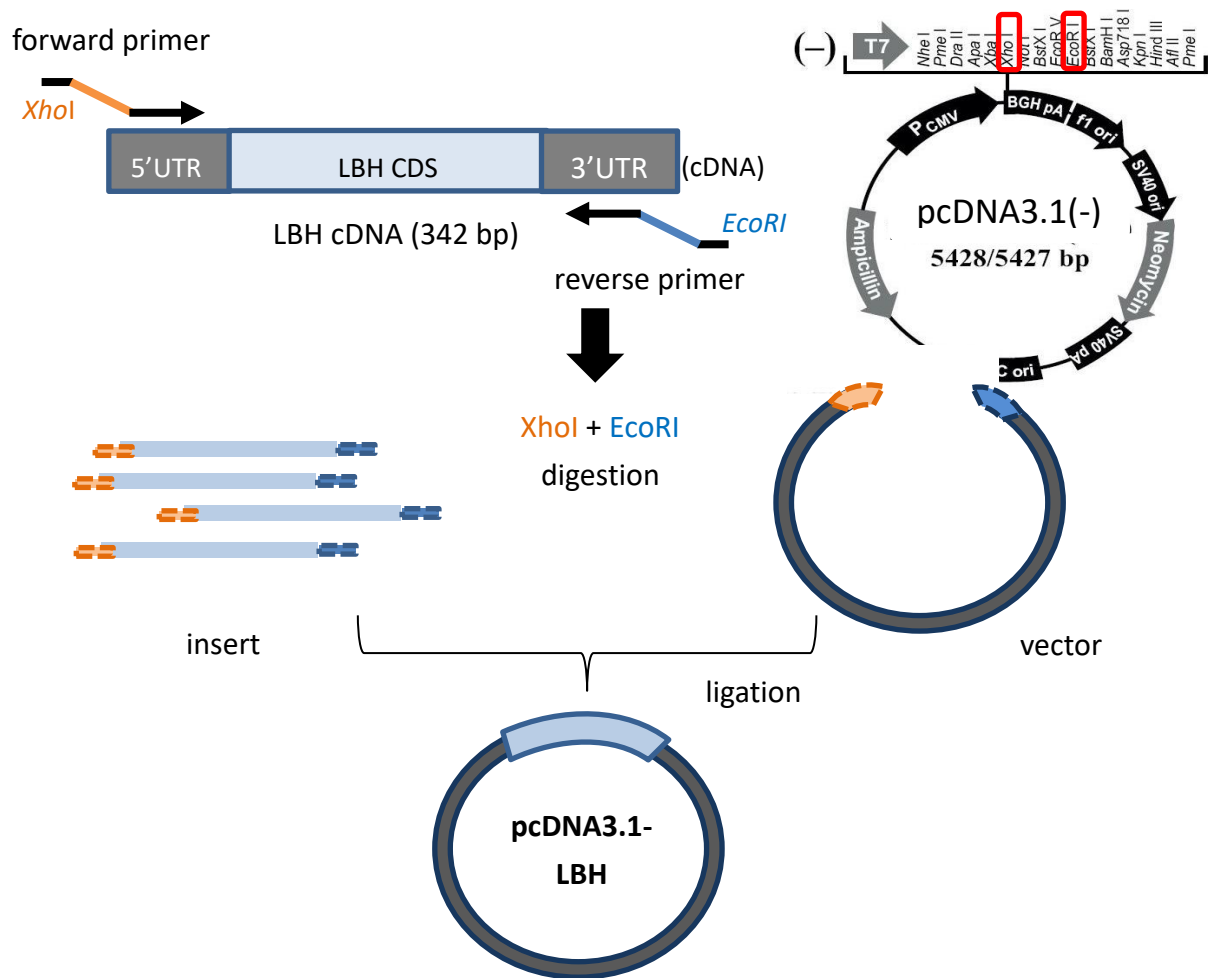

**Figure S8. *LBH* transient overexpression plasmid.** The strategy for the construction of the *LBH* plasmid for transient overexpression.

## Supplementary Tables

**Table S1. Clinicopathological characteristics of OPMD patients**

|                |                                           | Patients for analysis ( <i>n</i> = 25)* |
|----------------|-------------------------------------------|-----------------------------------------|
| Age (years)    | 51.4 ± 1.8                                |                                         |
| Gender         | Male                                      | 23                                      |
|                | Female                                    | 2                                       |
| Histopathology | Epithelial hyperplasia and hyperkeratosis | 12                                      |
|                | Epithelial dysplasia                      | 16                                      |

\*Three patients carry two individual lesions

**Table S2. The primers used in this study to acquire PCR products for cloning**

| Gene or construct | Direction | Sequences (5' - 3')            | Amplicon (bps) |
|-------------------|-----------|--------------------------------|----------------|
| <i>MIR31HG</i>    | Forward 1 | GATCCAGGTTCCACGTCCG            | ~2148          |
|                   | Reverse 1 | GTACCGACAAAGGTCACA AAGGATTATTG |                |
| <i>MIR31HG</i>    | Forward 2 | CAGGTTCCACGTCCGGCGC            | ~2148          |
|                   | Reverse 2 | CGACAAAGGTCACAAAGGATTATTG      |                |
| <i>LBH</i>        | Forward   | GGGCTCGAGGCCCTAGGACTTCATGTC    | 342            |
|                   | Reverse   | CCCGAATTCCACAGGGACTCTACTGCTC   |                |



**Table S3. The candidate transcripts**

| Correlation | ID<br>(ENSG<br>00000) | Gene name         | Gene type            | Gene description                                                | FPKM     |       |        | Ratio |     |
|-------------|-----------------------|-------------------|----------------------|-----------------------------------------------------------------|----------|-------|--------|-------|-----|
|             |                       |                   |                      |                                                                 | Parental | KO    | OE     | KO    | OE  |
| Positive    | 265073                | <i>AC010761.2</i> | antisense            |                                                                 | 0.12     | 0.05  | 0.35   | 0.4   | 2.9 |
|             | 266947                | <i>AC022916.1</i> | antisense            |                                                                 | 0.20     | 0.07  | 0.39   | 0.4   | 2.0 |
|             | 226889                | <i>AL359541.1</i> | antisense            |                                                                 | 0.32     | 0.14  | 0.64   | 0.4   | 2.0 |
|             | 273129                | <i>PACERR</i>     | LncRNA               | PTGS2 antisense NFKB1 complex-mediated expression regulator RNA | 0.84     | 0.3   | 1.73   | 0.4   | 2.1 |
|             | 243103                | <i>RN7SL452P</i>  | misc_RNA             | RNA, 7SL, cytoplasmic 452, pseudogene                           | 0.47     | 0.14  | 1.09   | 0.3   | 2.3 |
|             | 231333                | <i>RPL34P6</i>    | processed_pseudogene | ribosomal protein L34 pseudogene 6                              | 0.27     | 0.12  | 0.77   | 0.4   | 2.9 |
|             | 138135                | <i>CH25H</i>      | protein_coding       | cholesterol 25-hydroxylase                                      | 0.68     | 0.32  | 1.88   | 0.5   | 2.8 |
|             | 125845                | <i>BMP2</i>       | protein_coding       | bone morphogenetic protein 2                                    | 0.47     | 0.2   | 1.07   | 0.4   | 2.3 |
|             | 236925                | <i>LTB</i>        | protein_coding       | lymphotoxin beta                                                | 0.4      | 0.18  | 0.86   | 0.4   | 2.2 |
|             | 258713                | <i>C20orf141</i>  | protein_coding       | chromosome 20 open reading frame 141                            | 0.24     | 0.05  | 1.19   | 0.2   | 4.9 |
|             | 175003                | <i>SLC22A1</i>    | protein_coding       | solute carrier family 22 member 1                               | 0.2      | 0.09  | 0.41   | 0.4   | 2.1 |
|             | 196611                | <i>MMP1</i>       | protein_coding       | matrix metalloproteinase 1                                      | 99.31    | 34.73 | 282.01 | 0.3   | 2.8 |
|             | 166532                | <i>RIMKLB</i>     | protein_coding       | ribosomal modification protein rimK like family member B        | 0.20     | 0.08  | 0.81   | 0.4   | 4.1 |
|             | 151229                | <i>SLC2A13</i>    | protein_coding       | solute carrier family 2 member 13                               | 0.21     | 0.10  | 0.56   | 0.5   | 2.7 |
|             | 105427                | <i>CNFN</i>       | protein_coding       | cornifelin                                                      | 0.38     | 0.14  | 0.79   | 0.4   | 2.1 |
|             | 189221                | <i>MAOA</i>       | protein_coding       | monoamine oxidase A                                             | 0.44     | 0.10  | 1.03   | 0.2   | 2.3 |
|             | 138646                | <i>HERC5</i>      | protein_coding       | HECT and RLD domain containing E3 ubiquitin protein ligase 5    | 0.36     | 0.17  | 3.04   | 0.5   | 8.5 |
|             | 107551                | <i>RASSF4</i>     | protein_coding       | Ras association domain family member 4                          | 0.12     | 0.06  | 0.24   | 0.5   | 2.1 |
|             | 221303                | <i>SNORA79</i>    | snoRNA               | small nucleolar RNA, H/ACA box 79                               | 0.66     | 0.29  | 2.64   | 0.4   | 4.0 |

|              |        |                   |                                  |                                                               |      |       |      |     |     |
|--------------|--------|-------------------|----------------------------------|---------------------------------------------------------------|------|-------|------|-----|-----|
|              | 199805 | <i>RNU1-134P</i>  | snRNA                            | RNA, U1 small nuclear 134, pseudogene                         | 0.56 | 0.25  | 1.28 | 0.4 | 2.3 |
|              | 229344 | <i>MTCO2P12</i>   | unprocessed_pseudogene           | mitochondrially encoded cytochrome c oxidase II pseudogene 12 | 0.13 | 0.06  | 0.31 | 0.4 | 2.3 |
|              | 266191 | <i>RF00017</i>    |                                  |                                                               | 2.46 | 0.41  | 6.18 | 0.2 | 2.5 |
| Neg<br>ative | 269019 | <i>HOMER3-AS1</i> | antisense                        | HOMER3 antisense RNA 1                                        | 0.19 | 0.43  | 0.06 | 2.2 | 0.3 |
|              | 263627 | <i>PPP4R1-AS1</i> | LncRNA                           | PPP4R1 antisense RNA 1                                        | 0.36 | 0.76  | 0.14 | 2.1 | 0.4 |
|              | 272993 | <i>AC239868.3</i> | LncRNA                           |                                                               | 0.68 | 1.4   | 0.24 | 2   | 0.3 |
|              | 242175 | <i>RN7SL127P</i>  | misc_RNA                         | RNA, 7SL, cytoplasmic 127, pseudogene                         | 0.46 | 1.36  | 0.18 | 3.0 | 0.4 |
|              | 199459 | <i>RF00019</i>    | misc_RNA                         |                                                               | 1.25 | 3.35  | 0.48 | 2.7 | 0.4 |
|              | 233558 | <i>AL050331.1</i> | processed_pseudogene             |                                                               | 0.66 | 1.51  | 0.25 | 2.3 | 0.4 |
|              | 263829 | <i>SINHCAFP1</i>  | processed_pseudogene             | SINHCAF pseudogene 1                                          | 0.21 | 0.68  | 0.08 | 3.3 | 0.4 |
|              | 049769 | <i>PPP1R3F</i>    | protein_coding                   | protein phosphatase 1 regulatory subunit 3F                   | 0.84 | 1.69  | 0.34 | 2.0 | 0.4 |
|              | 138061 | <i>CYP1B1</i>     | protein_coding                   | cytochrome P450 family 1 subfamily B member 1                 | 0.23 | 0.49  | 0.1  | 2.1 | 0.4 |
|              | 116039 | <i>ATP6V1B1</i>   | protein_coding                   | ATPase H+ transporting V1 subunit B1                          | 0.17 | 0.43  | 0.08 | 2.5 | 0.5 |
|              | 213626 | <i>LBH</i>        | protein_coding                   | limb bud and heart development                                | 5.04 | 12.74 | 2.08 | 2.5 | 0.4 |
|              | 029534 | <i>ANK1</i>       | protein_coding                   | ankyrin 1                                                     | 0.42 | 0.9   | 0.18 | 2.2 | 0.4 |
|              | 214773 | <i>AC112512.1</i> | sense_intronic                   |                                                               | 0.16 | 0.34  | 0.07 | 2.1 | 0.5 |
|              | 207187 | <i>SNORA10B</i>   | snoRNA                           | small nucleolar RNA, H/ACA box 10B                            | 1.04 | 2.77  | 0.4  | 2.7 | 0.4 |
|              | 279691 | <i>AC113410.3</i> | TEC                              |                                                               | 1.58 | 3.83  | 0.52 | 2.4 | 0.3 |
|              | 240785 | <i>RPL36AP21</i>  | transcribed_processed_pseudogene | ribosomal protein L36a pseudogene 21                          | 0.21 | 0.45  | 0.08 | 2.1 | 0.4 |
|              | 248352 | <i>TNXA</i>       | pseudogene                       | tenascin XA (pseudogene)                                      | 0.23 | 0.48  | 0.05 | 2.1 | 0.2 |
|              | 282079 | <i>TAS2R64P</i>   | pseudogene                       | taste 2 receptor member 64 pseudogene                         | 0.15 | 0.44  | 0.06 | 3.0 | 0.4 |
|              | 283989 | <i>AC270107.2</i> | not defined                      |                                                               | 1.49 | 4.65  | 0.29 | 3.1 | 0.2 |

**Table S4. The candidate genes**

| Effector | Gene name        | FPKM     |       |        | Ratio |     |
|----------|------------------|----------|-------|--------|-------|-----|
|          |                  | Parental | KO    | OE     | KO    | OE  |
| Positive | <i>HERC5</i>     | 0.36     | 0.17  | 3.04   | 0.5   | 8.5 |
|          | <i>C20orf141</i> | 0.24     | 0.05  | 1.19   | 0.2   | 4.9 |
|          | <i>RIMKLB</i>    | 0.20     | 0.08  | 0.81   | 0.4   | 4.1 |
|          | <i>MMP1</i>      | 99.31    | 34.73 | 282.01 | 0.3   | 2.8 |
|          | <i>CH25H</i>     | 0.68     | 0.32  | 1.88   | 0.5   | 2.8 |
|          | <i>SLC2A13</i>   | 0.21     | 0.10  | 0.56   | 0.5   | 2.7 |
|          | <i>BMP2</i>      | 0.47     | 0.20  | 1.07   | 0.4   | 2.3 |
|          | <i>MAOA</i>      | 0.44     | 0.10  | 1.03   | 0.2   | 2.3 |
|          | <i>LTB</i>       | 0.40     | 0.18  | 0.86   | 0.4   | 2.2 |
|          | <i>SLC22A1</i>   | 0.20     | 0.09  | 0.41   | 0.4   | 2.1 |
|          | <i>CNFN</i>      | 0.38     | 0.14  | 0.79   | 0.4   | 2.1 |
|          | <i>RASSF4</i>    | 0.12     | 0.06  | 0.24   | 0.5   | 2.1 |
| Negative | <i>ATP6VIB1</i>  | 0.17     | 0.43  | 0.08   | 2.5   | 0.5 |
|          | <i>LBH</i>       | 5.04     | 12.74 | 2.08   | 2.5   | 0.4 |
|          | <i>ANK1</i>      | 0.42     | 0.90  | 0.18   | 2.2   | 0.4 |
|          | <i>CYP1B1</i>    | 0.23     | 0.49  | 0.10   | 2.1   | 0.4 |
|          | <i>PPP1R3F</i>   | 0.84     | 1.69  | 0.34   | 2.0   | 0.4 |

**Table S5. siRNAs and control oligonucleotide used in this study**

| siRNA              | Supplier | Cat. No.               |
|--------------------|----------|------------------------|
| Scr                | Ambion   | 4390843                |
|                    | BioTools | siRNA Negative Control |
| si- <i>MIR31HG</i> | Ambion   | n266049                |
| si- <i>MMP1</i>    | BioTools | MMP1-homo-1071         |
|                    |          | MMP1-homo-338          |
| si- <i>LBH</i>     | Ambion   | s37687                 |

**Table S6. The TaqMan probes used in this study**

| probe                 | Supplier           | Cat. No.      |
|-----------------------|--------------------|---------------|
| <b><i>MIR31HG</i></b> | Applied biosystems | Hs01007339_g1 |
| <b><i>MMP1</i></b>    | Applied biosystems | Hs00899658_m1 |
| <b><i>SLC2A13</i></b> | Applied biosystems | Hs01573078_m1 |
| <b><i>BMP2</i></b>    | Applied biosystems | Hs00154192_m1 |
| <b><i>LBH</i></b>     | Applied biosystems | Hs00368853_m1 |
| <b><i>GAPDH</i></b>   | Applied biosystems | Hs00266705_g1 |
| <b><i>miR-31</i></b>  | Applied biosystems | 002279        |
| <b><i>RNU6B</i></b>   | Applied biosystems | 001093        |

**Table S7. The primary antibodies used in this study**

| Antibody                                                           | MW<br>(kDa) | Host   | Dilution | Supplier           | Cat. No. |
|--------------------------------------------------------------------|-------------|--------|----------|--------------------|----------|
| <b>GAPDH</b>                                                       | 36          | mouse  | 1: 10000 | Santa Cruz Biotech | sc32233  |
| <b>BMP2</b>                                                        | 60          | goat   | 1:500    | Santa Cruz Biotech | sc6895   |
| <b>MMP1</b>                                                        | 54          | rabbit | 1:5000   | Abcam              | ab38929  |
| <b>LBH</b>                                                         | 17          | rabbit | 1:1000   | Invitrogen         | PA572031 |
| <b>FAK</b>                                                         | 125         | rabbit | 1:1000   | Santa Cruz Biotech | sc557    |
| <b>p-FAK<br/>(tyr-925)</b>                                         | 125         | goat   | 1:1000   | Santa Cruz Biotech | sc11766  |
| <b>AKT1</b>                                                        | 60          | mouse  | 1:1000   | Santa Cruz Biotech | sc5298   |
| <b>p-AKT<br/>(thr-308)</b>                                         | 60          | rabbit | 1:1000   | Cell Signaling     | 4056     |
| <b>p44/42 MAPK<br/>(ERK1/2)</b>                                    | 42,44       | rabbit | 1:1000   | Cell Signaling     | 9102     |
| <b>p-p44/42<br/>MAPK<br/>(ERK1/2)<br/>(Thr202/Tyr204)</b>          | 42,44       | rabbit | 1:1000   | Santa Cruz Biotech | 9101     |
| <b>src</b>                                                         | 60          | mouse  | 1:1000   | Cell Signaling     | 2110     |
| <b>p-src<br/>(Y418)</b>                                            | 60          | rabbit | 1:1000   | Biosource          | 411223A  |
| <b>Active <math>\beta</math>-<br/>catenin</b>                      | 92          | mouse  | 1:1000   | Millipore          | 05665    |
| <b>p-GSK3<math>\alpha</math>/<math>\beta</math><br/>(ser-21/9)</b> | 46          | rabbit | 1:1000   | Cell Signaling     | 9311L    |
| <b>TCF4</b>                                                        | 68          | rabbit | 1:1000   | Epitomics          | 21141    |

**Table S8. The secondary antibodies used in this study.**

| Antibody           | Dilution | Supplier  | Cat. No. |
|--------------------|----------|-----------|----------|
| <b>anti-goat</b>   | 1:1000   | Millipore | AP106P   |
| <b>anti-mouse</b>  | 1:1000   | Millipore | AP124P   |
| <b>anti-rabbit</b> | 1:1000   | Millipore | AP132P   |
